# Supplementary material for: Plasmon enhanced fluorescence of a bisphthalonitrile-based dye via a dopamine mediated interfacial crosslinking reaction on silver nanoparticles
Source: Royal Society of Chemistry journal article supplement (doi:10.1039/c5ra12242b), 2015-01-01
Supplement: c5ra12242b1.pdf [file c5ra12242b1.pdf]

## Electronic Supplementary Information (ESI)

### **Plasmon Enhanced Fluorescence of Bisphthalonitrile-based Dye via Dopamine Mediated Interfacial Crosslinking Reaction on Silver Nanoparticles**

Kun Jia,<sup>\*a,†</sup> Xuefei Zhou,<sup>a,†</sup> Lin Pan,<sup>a</sup> Liting Yuan,<sup>a</sup> Pan Wang,<sup>a</sup> Chunhui Wu,<sup>b</sup> Yumin  
Huang<sup>a</sup> and Xiaobo Liu<sup>\*a</sup>

<sup>a</sup> High Temperature Resistant Polymer and Functional Composites Key Laboratory of Sichuan Province, School of Microelectronics and Solid-States Electronics, University of Electronic Science and Technology of China, Chengdu 610054, China.

<sup>b</sup> Department of Biophysics, School of Life Science and Technology, University of Electronic Science and Technology of China, Chengdu 610054, China.

E-mail: [jiakun@uestc.edu.cn](mailto:jiakun@uestc.edu.cn), [liuxb@uestc.edu.cn](mailto:liuxb@uestc.edu.cn); Tel: +86-28-83207326

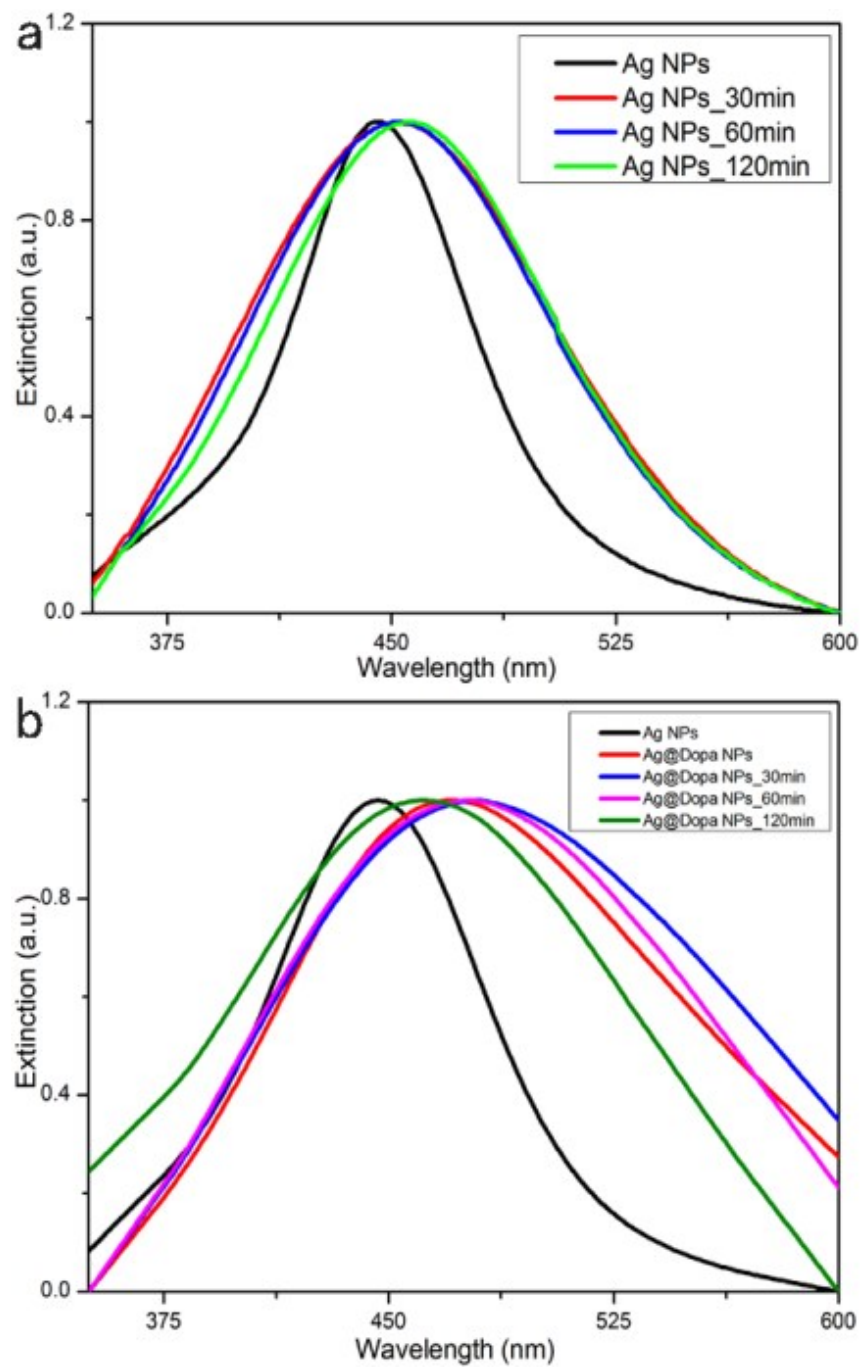

**Fig. S1** The UV-Vis spectra of pristine Ag NPs (a) and dopamine modified Ag NPs (b) during reaction with PP-BPH for different time.

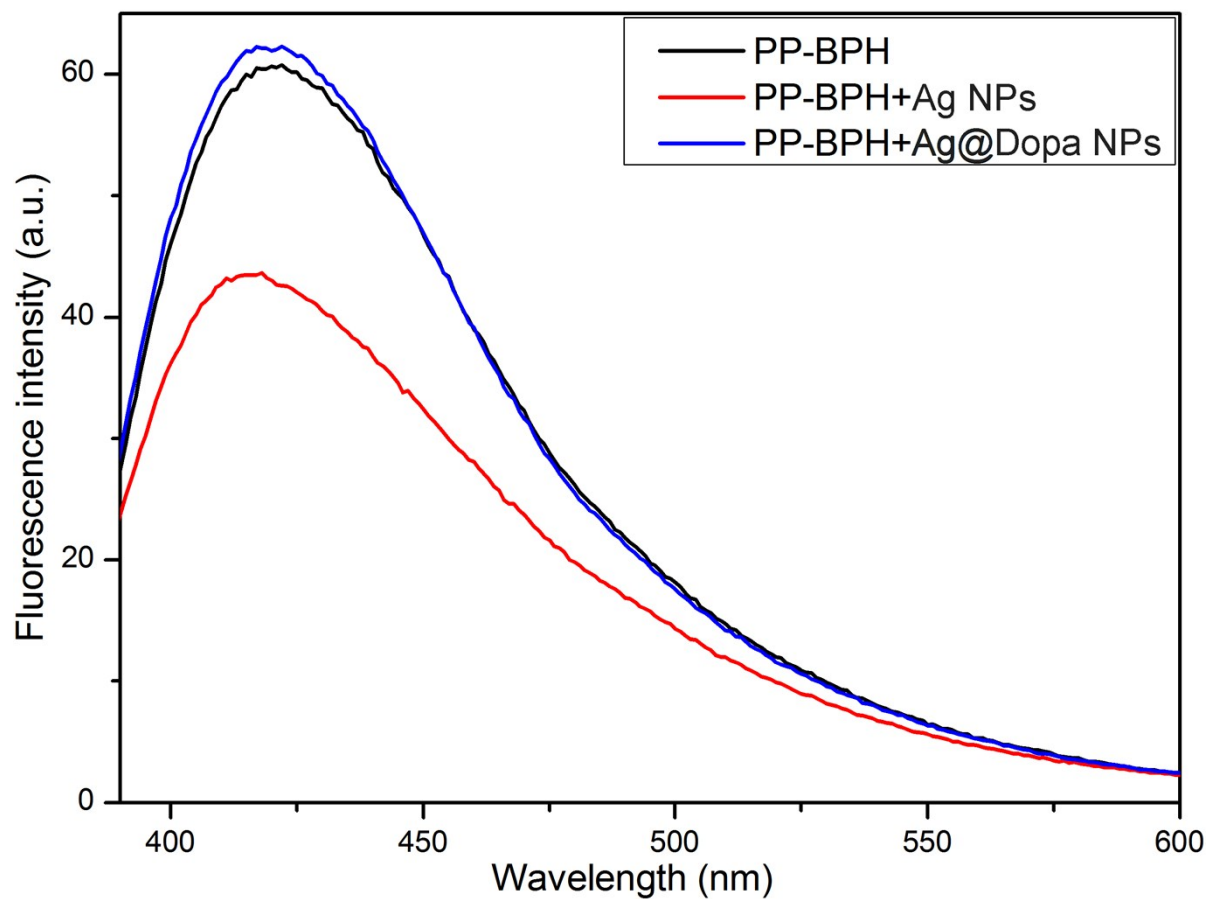

**Fig. S2** The fluorescent emission spectra of PP-BPH solution and PP-BPH solution admixed with synthesized Ag NPs or dopamine modified Ag NPs.

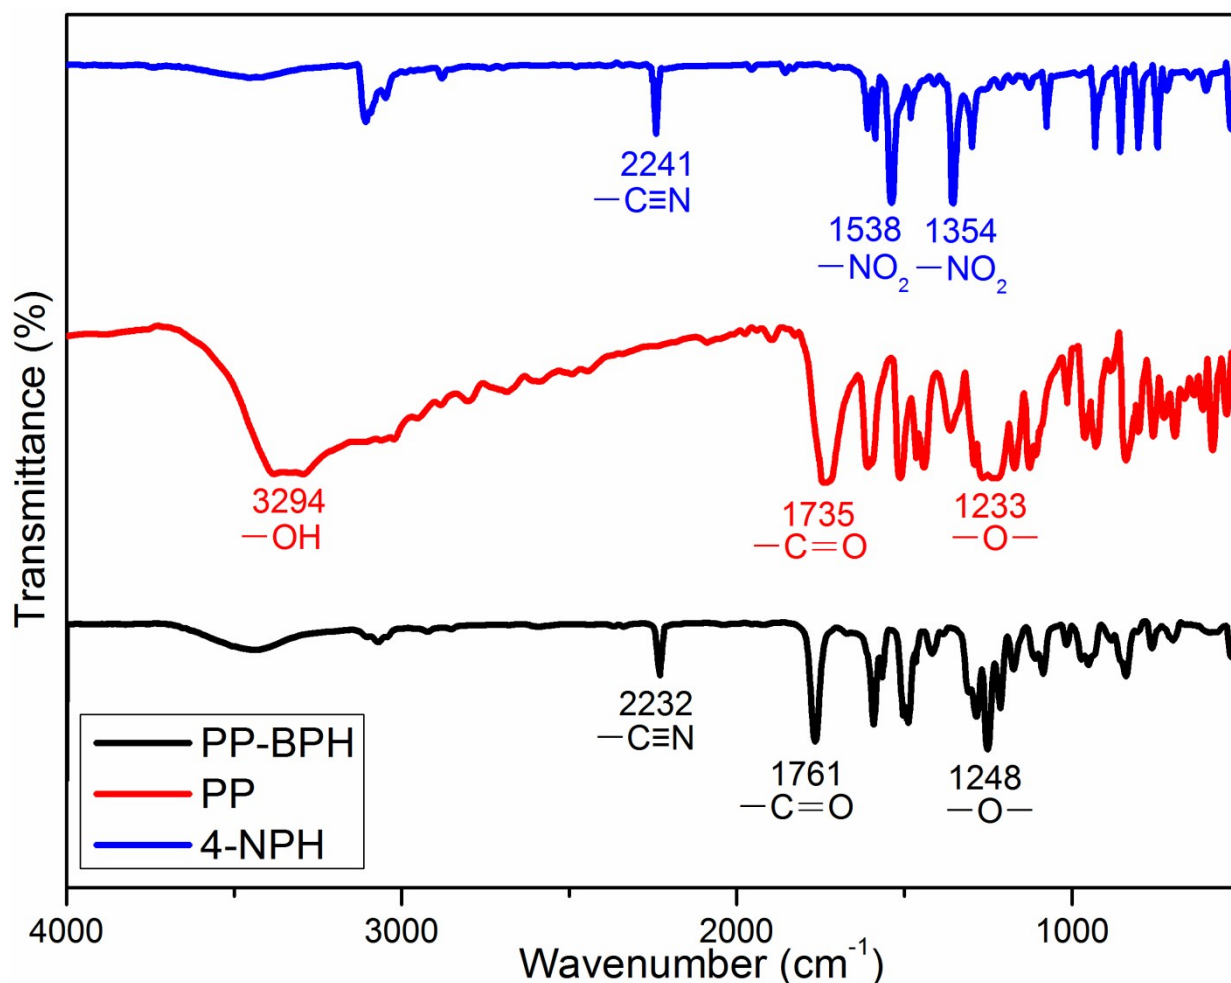

**Fig. S3** FTIR spectra of 4-NPH (4-nitrophthalonitrile), PP (phenolphthalein) and synthesized PP-BPH dye.

According to Fig. S3, it is clear that the peak at 3294 cm<sup>-1</sup>, corresponding to -OH group of phenolphthalein (PP), virtually disappeared in the FTIR spectra of PP-BPH product, the small peak near 3400 cm<sup>-1</sup> of PP-BPH should be attributed to the presence of trace quantity of water in the final product. In addition, the asymmetrical stretch band (1538 cm<sup>-1</sup>) and symmetrical stretch band (1354 cm<sup>-1</sup>) of -NO<sub>2</sub> from starting 4-NPH are absent in the FTIR spectra of PP-BPH product. Meanwhile, the stretch band of -CN (2241 cm<sup>-1</sup>), aromatic ether -O- (1233 cm<sup>-1</sup>) and ester -C=O (1735 cm<sup>-1</sup>) from two starting compounds were all detected with slight wavenumber shift in the FTIR spectra of PP-BPH product. All these results indicate that the successful reaction between nitro group of 4-nitrophthalonitrile and hydroxyl groups of phenolphthalein.

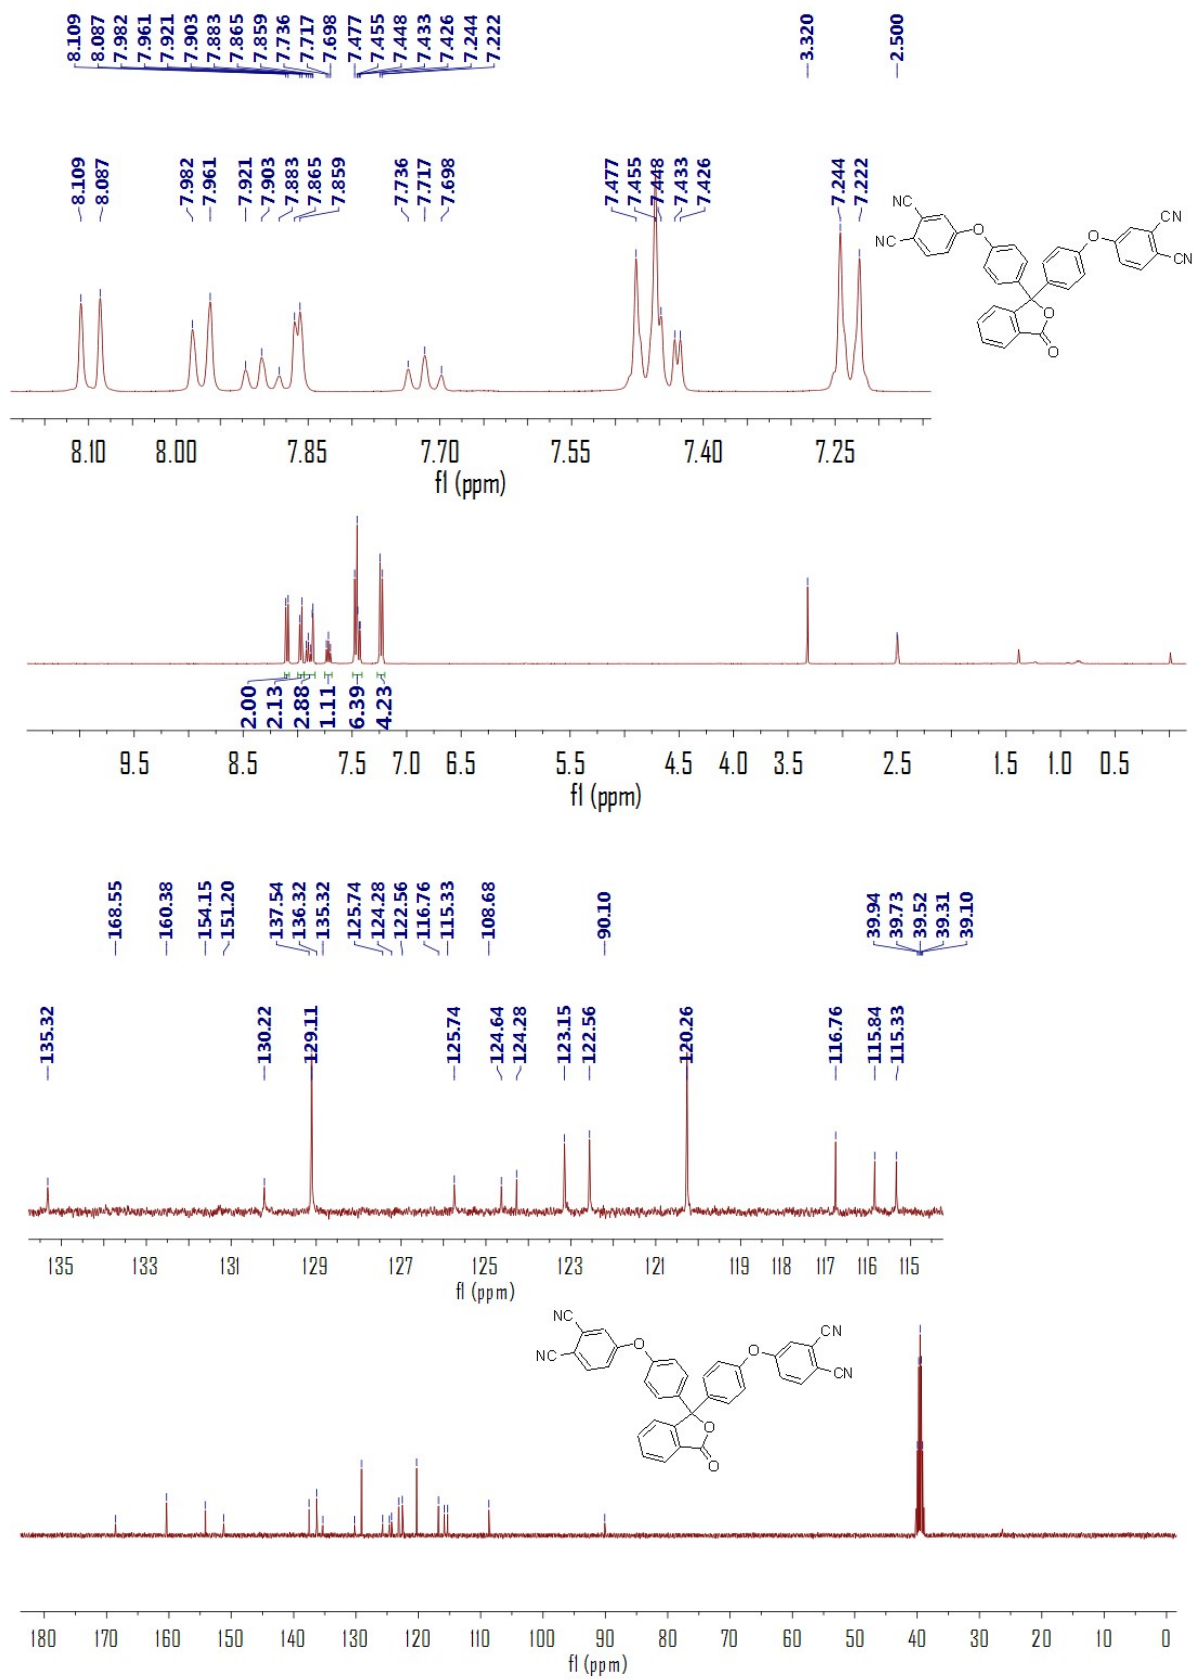

**Fig. S4** <sup>1</sup>H NMR (top) and <sup>13</sup>C NMR (down) spectra of synthesized PP-BPH dye.
